# Supplementary material for: Alternative separation strategy for o-/p-dichlorobenzene mixtures through supramolecular chemistry protocols
Source: Royal Society of Chemistry journal article supplement (doi:10.1039/d4ce00684d), 2024-01-01
Supplement: d4ce00684d1.pdf [file d4ce00684d1.pdf]

**Alternative separation strategy for *o*-/*p*-dichlorobenzene mixtures through supramolecular chemistry protocols**

**Brandon Barnardo,<sup>\*a</sup> Benita Barton,<sup>a</sup> Eric C Hosten<sup>a</sup>**

<sup>a</sup>*Department of Chemistry, PO Box 77000, Nelson Mandela University, Port Elizabeth, 6031, South Africa.*

*E-mail:* [s216717965@mandela.ac.za](mailto:s216717965@mandela.ac.za)

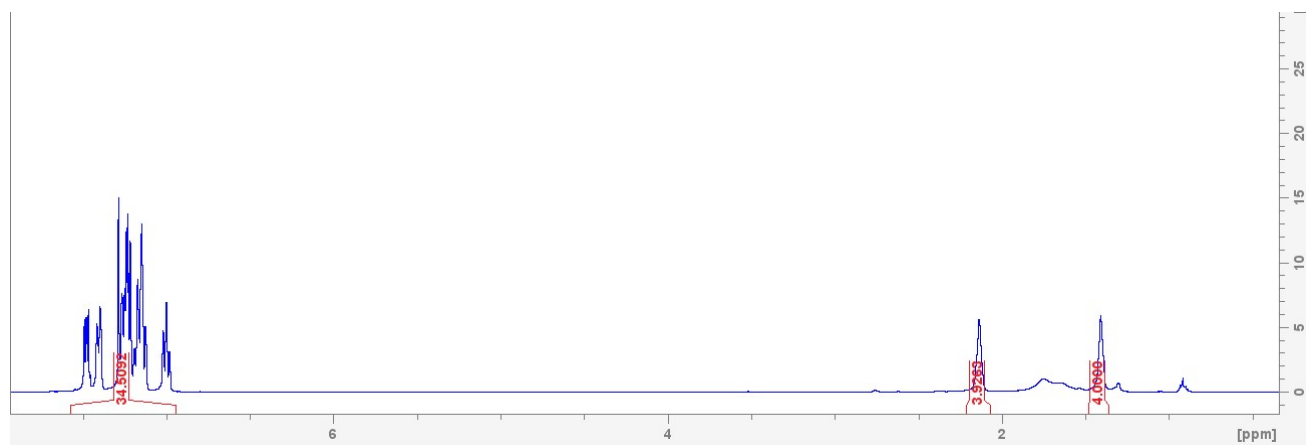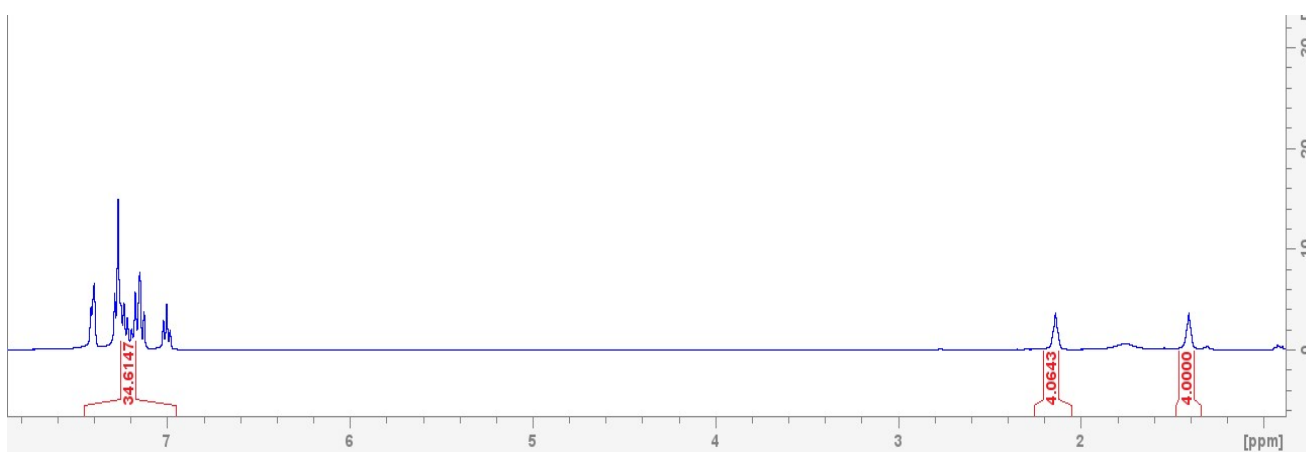

**Figure S1**  $^1\text{H-NMR}$  spectra of  $\mathbf{H}\cdot 1.5(o\text{DCB})$ (top) and  $\mathbf{H}\cdot 1.5(m\text{DCB})$  (bottom).

**Table S1** Selectivity coefficients ( $K$ ) and guest:guest ratios when  $\mathbf{H}$  was crystallized from the various binary mixtures.

| <i>o/m</i> DCB                      |      |       | <i>o/p</i> DCB                      |      |              | <i>m/p</i> DCB                      |      |       |
|-------------------------------------|------|-------|-------------------------------------|------|--------------|-------------------------------------|------|-------|
| Molar concentration of <i>o</i> DCB | G:G  | $K_A$ | Molar concentration of <i>o</i> DCB | G:G  | $K_A$        | Molar concentration of <i>m</i> DCB | G:G  | $K_A$ |
| 20                                  | 16.6 | 0.8   | 20                                  | 65.8 | 7.7          | 20                                  | 41.1 | 2.8   |
| 40                                  | 59.4 | 2.2   | 40                                  | 89.3 | 12.5         | 40                                  | 57.7 | 2.0   |
| 60                                  | 78.8 | 2.5   | 60                                  | 90.9 | 6.7          | 60                                  | 73.1 | 1.8   |
| 80                                  | 95.6 | 5.4   | 80                                  | 100  | <sup>a</sup> | 80                                  | 90.1 | 2.3   |

<sup>a</sup>  $K$  value is infinitive due to only *o*DCB being measured in the complex

**Table S2** Atomic coordinates ( $\times 10^4$ ) and equivalent isotropic displacement parameters ( $\text{\AA}^2 \times 10^3$ ) for  $\mathbf{H}\cdot 1.5(o\text{DCB})$ .  $U(\text{eq})$  is defined as one third of the trace of the orthogonalized  $U^{ij}$  tensor.

|        | x        | y        | z       | U(eq)  |
|--------|----------|----------|---------|--------|
| O(1)   | 3469(2)  | 1541(1)  | 2571(1) | 42(1)  |
| O(2)   | 910(2)   | 9376(1)  | 2468(1) | 39(1)  |
| N(1)   | 4411(2)  | 3511(1)  | 3743(1) | 33(1)  |
| N(2)   | 970(2)   | 6829(1)  | 1619(1) | 35(1)  |
| C(1)   | 4738(2)  | 2479(1)  | 3772(1) | 26(1)  |
| C(2)   | 3661(3)  | 3956(1)  | 3023(1) | 41(1)  |
| C(3)   | 3027(3)  | 4990(1)  | 3110(1) | 38(1)  |
| C(4)   | 2349(3)  | 5449(1)  | 2337(1) | 40(1)  |
| C(5)   | 1690(3)  | 6485(1)  | 2373(1) | 40(1)  |
| C(6)   | 514(2)   | 7851(1)  | 1502(1) | 29(1)  |
| C(11)  | 3185(2)  | 2169(1)  | 3907(1) | 27(1)  |
| C(12)  | 2654(2)  | 1728(1)  | 3323(1) | 32(1)  |
| C(13)  | 1238(2)  | 1436(2)  | 3458(1) | 40(1)  |
| C(14)  | 339(2)   | 1590(2)  | 4193(2) | 44(1)  |
| C(15)  | 839(2)   | 2029(2)  | 4792(1) | 43(1)  |
| C(16)  | 2243(2)  | 2316(2)  | 4647(1) | 36(1)  |
| C(21)  | 5653(2)  | 2081(1)  | 2991(1) | 29(1)  |
| C(22)  | 4982(2)  | 1674(1)  | 2439(1) | 33(1)  |
| C(23)  | 5803(3)  | 1356(2)  | 1702(1) | 42(1)  |
| C(24)  | 7322(3)  | 1451(2)  | 1517(1) | 45(1)  |
| C(25)  | 8028(3)  | 1851(2)  | 2059(1) | 46(1)  |
| C(26)  | 7198(2)  | 2162(2)  | 2784(1) | 39(1)  |
| C(31)  | 5656(2)  | 2088(1)  | 4503(1) | 30(1)  |
| C(32)  | 6085(2)  | 2639(2)  | 5036(1) | 40(1)  |
| C(33)  | 6885(3)  | 2213(2)  | 5703(1) | 53(1)  |
| C(34)  | 7247(3)  | 1260(2)  | 5825(1) | 55(1)  |
| C(35)  | 6826(3)  | 707(2)   | 5294(2) | 50(1)  |
| C(36)  | 6031(2)  | 1120(2)  | 4639(1) | 38(1)  |
| C(41)  | -626(2)  | 8269(1)  | 2206(1) | 31(1)  |
| C(42)  | -390(2)  | 8988(1)  | 2632(1) | 32(1)  |
| C(43)  | -1464(3) | 9366(2)  | 3265(1) | 45(1)  |
| C(44)  | -2798(3) | 9021(2)  | 3473(2) | 51(1)  |
| C(45)  | -3073(3) | 8307(2)  | 3054(2) | 51(1)  |
| C(46)  | -1994(3) | 7939(2)  | 2426(1) | 44(1)  |
| C(51)  | 1966(2)  | 8264(1)  | 1428(1) | 30(1)  |
| C(52)  | 2105(2)  | 8965(1)  | 1909(1) | 31(1)  |
| C(53)  | 3460(3)  | 9307(2)  | 1862(1) | 40(1)  |
| C(54)  | 4701(3)  | 8958(2)  | 1309(2) | 48(1)  |
| C(55)  | 4596(3)  | 8267(2)  | 808(2)  | 53(1)  |
| C(56)  | 3244(3)  | 7925(2)  | 869(2)  | 45(1)  |
| C(61)  | -286(2)  | 8094(1)  | 710(1)  | 31(1)  |
| C(62)  | -462(3)  | 7428(2)  | 204(1)  | 42(1)  |
| C(63)  | -1222(3) | 7697(2)  | -500(1) | 48(1)  |
| C(64)  | -1804(3) | 8622(2)  | -698(1) | 43(1)  |
| C(65)  | -1648(3) | 9290(2)  | -195(2) | 48(1)  |
| C(66)  | -886(3)  | 9025(2)  | 504(1)  | 44(1)  |
| Cl(71) | 9291(1)  | 4004(1)  | 2011(1) | 85(1)  |
| Cl(72) | 6598(1)  | 5827(1)  | 2067(1) | 78(1)  |
| C(71)  | 8561(3)  | 4512(2)  | 2919(2) | 54(1)  |
| C(72)  | 7396(3)  | 5319(2)  | 2938(2) | 51(1)  |
| C(73)  | 6856(3)  | 5713(2)  | 3678(2) | 57(1)  |
| C(74)  | 7456(4)  | 5311(2)  | 4389(2) | 61(1)  |
| C(75)  | 8598(4)  | 4508(2)  | 4362(2) | 63(1)  |
| C(76)  | 9153(3)  | 4114(2)  | 3629(2) | 64(1)  |
| Cl(81) | 4774(4)  | 3555(2)  | 804(2)  | 103(1) |
| Cl(82) | 1899(3)  | 4864(1)  | 52(1)   | 90(1)  |
| C(81)  | 4988(10) | 4575(4)  | 249(3)  | 74(2)  |
| C(82)  | 3711(19) | 5143(16) | -90(20) | 77(3)  |
| C(83)  | 3839(10) | 5995(5)  | -579(4) | 78(2)  |
| C(84)  | 5403(14) | 6130(8)  | -590(7) | 101(3) |
| C(85)  | 6642(11) | 5626(6)  | -273(5) | 95(2)  |
| C(86)  | 6400(20) | 4819(17) | 150(20) | 86(3)  |

**Table S3** Bond lengths [Å] and angles [°] for **H**·1.5(*o*DCB)

---

|             |          |
|-------------|----------|
| O(1)-C(12)  | 1.376(2) |
| O(1)-C(22)  | 1.381(2) |
| O(2)-C(42)  | 1.379(2) |
| O(2)-C(52)  | 1.384(2) |
| N(1)-C(2)   | 1.468(3) |
| N(1)-C(1)   | 1.479(2) |
| N(1)-H(1)   | 0.89(3)  |
| N(2)-C(5)   | 1.470(3) |
| N(2)-C(6)   | 1.471(2) |
| N(2)-H(2)   | 0.87(4)  |
| C(1)-C(11)  | 1.523(2) |
| C(1)-C(21)  | 1.525(2) |
| C(1)-C(31)  | 1.538(2) |
| C(2)-C(3)   | 1.514(3) |
| C(2)-H(2A)  | 0.9900   |
| C(2)-H(2B)  | 0.9900   |
| C(3)-C(4)   | 1.521(3) |
| C(3)-H(3A)  | 0.9900   |
| C(3)-H(3B)  | 0.9900   |
| C(4)-C(5)   | 1.510(3) |
| C(4)-H(4A)  | 0.9900   |
| C(4)-H(4B)  | 0.9900   |
| C(5)-H(5A)  | 0.9900   |
| C(5)-H(5B)  | 0.9900   |
| C(6)-C(41)  | 1.520(3) |
| C(6)-C(51)  | 1.522(3) |
| C(6)-C(61)  | 1.541(3) |
| C(11)-C(12) | 1.383(3) |
| C(11)-C(16) | 1.398(3) |
| C(12)-C(13) | 1.396(3) |
| C(13)-C(14) | 1.376(3) |
| C(13)-H(13) | 0.9500   |
| C(14)-C(15) | 1.385(3) |
| C(14)-H(14) | 0.9500   |
| C(15)-C(16) | 1.383(3) |
| C(15)-H(15) | 0.9500   |
| C(16)-H(16) | 0.9500   |
| C(21)-C(22) | 1.382(3) |
| C(21)-C(26) | 1.395(3) |
| C(22)-C(23) | 1.401(3) |
| C(23)-C(24) | 1.374(3) |
| C(23)-H(23) | 0.9500   |
| C(24)-C(25) | 1.383(4) |
| C(24)-H(24) | 0.9500   |
| C(25)-C(26) | 1.383(3) |
| C(25)-H(25) | 0.9500   |
| C(26)-H(26) | 0.9500   |
| C(31)-C(32) | 1.380(3) |
| C(31)-C(36) | 1.395(3) |
| C(32)-C(33) | 1.409(3) |
| C(32)-H(32) | 0.9500   |
| C(33)-C(34) | 1.370(4) |
| C(33)-H(33) | 0.9500   |
| C(34)-C(35) | 1.377(4) |
| C(34)-H(34) | 0.9500   |
| C(35)-C(36) | 1.387(3) |
| C(35)-H(35) | 0.9500   |
| C(36)-H(36) | 0.9500   |
| C(41)-C(42) | 1.379(3) |
| C(41)-C(46) | 1.395(3) |
| C(42)-C(43) | 1.391(3) |
| C(43)-C(44) | 1.378(3) |
| C(43)-H(43) | 0.9500   |
| C(44)-C(45) | 1.380(4) |
| C(44)-H(44) | 0.9500   |

|                  |            |
|------------------|------------|
| C(45)-C(46)      | 1.382(3)   |
| C(45)-H(45)      | 0.9500     |
| C(46)-H(46)      | 0.9500     |
| C(51)-C(52)      | 1.384(3)   |
| C(51)-C(56)      | 1.399(3)   |
| C(52)-C(53)      | 1.387(3)   |
| C(53)-C(54)      | 1.376(3)   |
| C(53)-H(53)      | 0.9500     |
| C(54)-C(55)      | 1.385(4)   |
| C(54)-H(54)      | 0.9500     |
| C(55)-C(56)      | 1.382(3)   |
| C(55)-H(55)      | 0.9500     |
| C(56)-H(56)      | 0.9500     |
| C(61)-C(62)      | 1.381(3)   |
| C(61)-C(66)      | 1.386(3)   |
| C(62)-C(63)      | 1.399(3)   |
| C(62)-H(62)      | 0.9500     |
| C(63)-C(64)      | 1.372(4)   |
| C(63)-H(63)      | 0.9500     |
| C(64)-C(65)      | 1.374(3)   |
| C(64)-H(64)      | 0.9500     |
| C(65)-C(66)      | 1.391(3)   |
| C(65)-H(65)      | 0.9500     |
| C(66)-H(66)      | 0.9500     |
| Cl(71)-C(71)     | 1.723(3)   |
| Cl(72)-C(72)     | 1.721(3)   |
| C(71)-C(76)      | 1.376(4)   |
| C(71)-C(72)      | 1.391(4)   |
| C(72)-C(73)      | 1.383(4)   |
| C(73)-C(74)      | 1.382(4)   |
| C(73)-H(73)      | 0.9500     |
| C(74)-C(75)      | 1.377(4)   |
| C(74)-H(74)      | 0.9500     |
| C(75)-C(76)      | 1.376(4)   |
| C(75)-H(75)      | 0.9500     |
| C(76)-H(76)      | 0.9500     |
| Cl(81)-C(81)     | 1.728(6)   |
| Cl(82)-C(82)     | 1.720(13)  |
| C(81)-C(86)      | 1.359(14)  |
| C(81)-C(82)      | 1.394(13)  |
| C(82)-C(83)      | 1.455(13)  |
| C(83)-C(84)      | 1.435(12)  |
| C(83)-H(83)      | 0.9500     |
| C(84)-C(85)      | 1.321(12)  |
| C(84)-H(84)      | 0.9500     |
| C(85)-C(86)      | 1.368(13)  |
| C(85)-H(85)      | 0.9500     |
| C(86)-H(86)      | 0.9500     |
| C(12)-O(1)-C(22) | 118.19(15) |
| C(42)-O(2)-C(52) | 118.41(15) |
| C(2)-N(1)-C(1)   | 113.82(15) |
| C(2)-N(1)-H(1)   | 107.9(16)  |
| C(1)-N(1)-H(1)   | 106.8(16)  |
| C(5)-N(2)-C(6)   | 115.19(16) |
| C(5)-N(2)-H(2)   | 111(3)     |
| C(6)-N(2)-H(2)   | 109(3)     |
| N(1)-C(1)-C(11)  | 108.09(14) |
| N(1)-C(1)-C(21)  | 112.72(15) |
| C(11)-C(1)-C(21) | 109.32(15) |
| N(1)-C(1)-C(31)  | 109.43(15) |
| C(11)-C(1)-C(31) | 107.87(14) |
| C(21)-C(1)-C(31) | 109.28(14) |
| N(1)-C(2)-C(3)   | 111.79(17) |
| N(1)-C(2)-H(2A)  | 109.3      |
| C(3)-C(2)-H(2A)  | 109.3      |
| N(1)-C(2)-H(2B)  | 109.3      |
| C(3)-C(2)-H(2B)  | 109.3      |

|                   |            |
|-------------------|------------|
| H(2A)-C(2)-H(2B)  | 107.9      |
| C(2)-C(3)-C(4)    | 110.95(17) |
| C(2)-C(3)-H(3A)   | 109.4      |
| C(4)-C(3)-H(3A)   | 109.4      |
| C(2)-C(3)-H(3B)   | 109.4      |
| C(4)-C(3)-H(3B)   | 109.4      |
| H(3A)-C(3)-H(3B)  | 108.0      |
| C(5)-C(4)-C(3)    | 114.37(18) |
| C(5)-C(4)-H(4A)   | 108.7      |
| C(3)-C(4)-H(4A)   | 108.7      |
| C(5)-C(4)-H(4B)   | 108.7      |
| C(3)-C(4)-H(4B)   | 108.7      |
| H(4A)-C(4)-H(4B)  | 107.6      |
| N(2)-C(5)-C(4)    | 109.05(17) |
| N(2)-C(5)-H(5A)   | 109.9      |
| C(4)-C(5)-H(5A)   | 109.9      |
| N(2)-C(5)-H(5B)   | 109.9      |
| C(4)-C(5)-H(5B)   | 109.9      |
| H(5A)-C(5)-H(5B)  | 108.3      |
| N(2)-C(6)-C(41)   | 111.54(15) |
| N(2)-C(6)-C(51)   | 109.16(15) |
| C(41)-C(6)-C(51)  | 109.69(15) |
| N(2)-C(6)-C(61)   | 108.71(15) |
| C(41)-C(6)-C(61)  | 108.33(15) |
| C(51)-C(6)-C(61)  | 109.38(15) |
| C(12)-C(11)-C(16) | 117.36(17) |
| C(12)-C(11)-C(1)  | 122.43(16) |
| C(16)-C(11)-C(1)  | 120.20(16) |
| O(1)-C(12)-C(11)  | 123.10(17) |
| O(1)-C(12)-C(13)  | 114.97(18) |
| C(11)-C(12)-C(13) | 121.93(18) |
| C(14)-C(13)-C(12) | 119.3(2)   |
| C(14)-C(13)-H(13) | 120.4      |
| C(12)-C(13)-H(13) | 120.4      |
| C(13)-C(14)-C(15) | 120.2(2)   |
| C(13)-C(14)-H(14) | 119.9      |
| C(15)-C(14)-H(14) | 119.9      |
| C(16)-C(15)-C(14) | 119.8(2)   |
| C(16)-C(15)-H(15) | 120.1      |
| C(14)-C(15)-H(15) | 120.1      |
| C(15)-C(16)-C(11) | 121.4(2)   |
| C(15)-C(16)-H(16) | 119.3      |
| C(11)-C(16)-H(16) | 119.3      |
| C(22)-C(21)-C(26) | 117.02(18) |
| C(22)-C(21)-C(1)  | 122.25(16) |
| C(26)-C(21)-C(1)  | 120.64(17) |
| O(1)-C(22)-C(21)  | 123.12(17) |
| O(1)-C(22)-C(23)  | 114.87(18) |
| C(21)-C(22)-C(23) | 122.01(19) |
| C(24)-C(23)-C(22) | 119.3(2)   |
| C(24)-C(23)-H(23) | 120.3      |
| C(22)-C(23)-H(23) | 120.3      |
| C(23)-C(24)-C(25) | 120.0(2)   |
| C(23)-C(24)-H(24) | 120.0      |
| C(25)-C(24)-H(24) | 120.0      |
| C(26)-C(25)-C(24) | 119.9(2)   |
| C(26)-C(25)-H(25) | 120.1      |
| C(24)-C(25)-H(25) | 120.1      |
| C(25)-C(26)-C(21) | 121.8(2)   |
| C(25)-C(26)-H(26) | 119.1      |
| C(21)-C(26)-H(26) | 119.1      |
| C(32)-C(31)-C(36) | 118.84(19) |
| C(32)-C(31)-C(1)  | 123.75(18) |
| C(36)-C(31)-C(1)  | 117.38(17) |
| C(31)-C(32)-C(33) | 119.4(2)   |
| C(31)-C(32)-H(32) | 120.3      |
| C(33)-C(32)-H(32) | 120.3      |

|                   |            |
|-------------------|------------|
| C(34)-C(33)-C(32) | 121.0(2)   |
| C(34)-C(33)-H(33) | 119.5      |
| C(32)-C(33)-H(33) | 119.5      |
| C(33)-C(34)-C(35) | 119.9(2)   |
| C(33)-C(34)-H(34) | 120.0      |
| C(35)-C(34)-H(34) | 120.0      |
| C(34)-C(35)-C(36) | 119.6(2)   |
| C(34)-C(35)-H(35) | 120.2      |
| C(36)-C(35)-H(35) | 120.2      |
| C(35)-C(36)-C(31) | 121.3(2)   |
| C(35)-C(36)-H(36) | 119.3      |
| C(31)-C(36)-H(36) | 119.3      |
| C(42)-C(41)-C(46) | 117.72(19) |
| C(42)-C(41)-C(6)  | 122.67(17) |
| C(46)-C(41)-C(6)  | 119.58(18) |
| O(2)-C(42)-C(41)  | 123.09(17) |
| O(2)-C(42)-C(43)  | 115.45(18) |
| C(41)-C(42)-C(43) | 121.46(19) |
| C(44)-C(43)-C(42) | 119.5(2)   |
| C(44)-C(43)-H(43) | 120.2      |
| C(42)-C(43)-H(43) | 120.2      |
| C(43)-C(44)-C(45) | 120.4(2)   |
| C(43)-C(44)-H(44) | 119.8      |
| C(45)-C(44)-H(44) | 119.8      |
| C(44)-C(45)-C(46) | 119.4(2)   |
| C(44)-C(45)-H(45) | 120.3      |
| C(46)-C(45)-H(45) | 120.3      |
| C(45)-C(46)-C(41) | 121.6(2)   |
| C(45)-C(46)-H(46) | 119.2      |
| C(41)-C(46)-H(46) | 119.2      |
| C(52)-C(51)-C(56) | 117.13(19) |
| C(52)-C(51)-C(6)  | 122.62(17) |
| C(56)-C(51)-C(6)  | 120.24(18) |
| O(2)-C(52)-C(51)  | 122.73(17) |
| O(2)-C(52)-C(53)  | 115.10(18) |
| C(51)-C(52)-C(53) | 122.17(19) |
| C(54)-C(53)-C(52) | 119.4(2)   |
| C(54)-C(53)-H(53) | 120.3      |
| C(52)-C(53)-H(53) | 120.3      |
| C(53)-C(54)-C(55) | 120.1(2)   |
| C(53)-C(54)-H(54) | 119.9      |
| C(55)-C(54)-H(54) | 119.9      |
| C(56)-C(55)-C(54) | 119.8(2)   |
| C(56)-C(55)-H(55) | 120.1      |
| C(54)-C(55)-H(55) | 120.1      |
| C(55)-C(56)-C(51) | 121.4(2)   |
| C(55)-C(56)-H(56) | 119.3      |
| C(51)-C(56)-H(56) | 119.3      |
| C(62)-C(61)-C(66) | 118.35(19) |
| C(62)-C(61)-C(6)  | 123.19(18) |
| C(66)-C(61)-C(6)  | 118.44(17) |
| C(61)-C(62)-C(63) | 120.2(2)   |
| C(61)-C(62)-H(62) | 119.9      |
| C(63)-C(62)-H(62) | 119.9      |
| C(64)-C(63)-C(62) | 120.7(2)   |
| C(64)-C(63)-H(63) | 119.6      |
| C(62)-C(63)-H(63) | 119.6      |
| C(63)-C(64)-C(65) | 119.6(2)   |
| C(63)-C(64)-H(64) | 120.2      |
| C(65)-C(64)-H(64) | 120.2      |
| C(64)-C(65)-C(66) | 119.8(2)   |
| C(64)-C(65)-H(65) | 120.1      |
| C(66)-C(65)-H(65) | 120.1      |
| C(61)-C(66)-C(65) | 121.3(2)   |
| C(61)-C(66)-H(66) | 119.3      |
| C(65)-C(66)-H(66) | 119.3      |
| C(76)-C(71)-C(72) | 120.2(2)   |

|                    |           |
|--------------------|-----------|
| C(76)-C(71)-Cl(71) | 119.1(2)  |
| C(72)-C(71)-Cl(71) | 120.7(2)  |
| C(73)-C(72)-C(71)  | 118.9(3)  |
| C(73)-C(72)-Cl(72) | 119.4(2)  |
| C(71)-C(72)-Cl(72) | 121.7(2)  |
| C(74)-C(73)-C(72)  | 120.7(3)  |
| C(74)-C(73)-H(73)  | 119.6     |
| C(72)-C(73)-H(73)  | 119.6     |
| C(75)-C(74)-C(73)  | 119.7(3)  |
| C(75)-C(74)-H(74)  | 120.2     |
| C(73)-C(74)-H(74)  | 120.2     |
| C(76)-C(75)-C(74)  | 120.1(3)  |
| C(76)-C(75)-H(75)  | 119.9     |
| C(74)-C(75)-H(75)  | 119.9     |
| C(75)-C(76)-C(71)  | 120.3(3)  |
| C(75)-C(76)-H(76)  | 119.8     |
| C(71)-C(76)-H(76)  | 119.8     |
| C(86)-C(81)-C(82)  | 120.6(10) |
| C(86)-C(81)-Cl(81) | 119.7(7)  |
| C(82)-C(81)-Cl(81) | 119.8(7)  |
| C(81)-C(82)-C(83)  | 122.0(10) |
| C(81)-C(82)-Cl(82) | 121.6(8)  |
| C(83)-C(82)-Cl(82) | 116.5(9)  |
| C(84)-C(83)-C(82)  | 108.1(9)  |
| C(84)-C(83)-H(83)  | 125.9     |
| C(82)-C(83)-H(83)  | 125.9     |
| C(85)-C(84)-C(83)  | 132.2(11) |
| C(85)-C(84)-H(84)  | 113.9     |
| C(83)-C(84)-H(84)  | 113.9     |
| C(84)-C(85)-C(86)  | 114.4(12) |
| C(84)-C(85)-H(85)  | 122.8     |
| C(86)-C(85)-H(85)  | 122.8     |
| C(81)-C(86)-C(85)  | 122.6(13) |
| C(81)-C(86)-H(86)  | 118.7     |
| C(85)-C(86)-H(86)  | 118.7     |

Symmetry transformations used to generate equivalent atoms:

**Table S4** Anisotropic displacement parameters ( $\text{\AA}^2 \times 10^3$ ) for  $\mathbf{H} \cdot 1.5(o\text{DCB})$ . The anisotropic displacement factor exponent takes the form:  $-2p^2 [ h^2 a^* 2U^{11} + \dots + 2 h k a^* b^* U^{12} ]$

|       | U <sup>11</sup> | U <sup>22</sup> | U <sup>33</sup> | U <sup>23</sup> |
|-------|-----------------|-----------------|-----------------|-----------------|
| O(1)  | 36(1)           | 60(1)           | 35(1)           | -15(1)          |
| O(2)  | 39(1)           | 44(1)           | 36(1)           | -12(1)          |
| N(1)  | 41(1)           | 27(1)           | 31(1)           | 1(1)            |
| N(2)  | 46(1)           | 26(1)           | 34(1)           | 1(1)            |
| C(1)  | 26(1)           | 26(1)           | 25(1)           | 2(1)            |
| C(2)  | 60(1)           | 28(1)           | 32(1)           | 2(1)            |
| C(3)  | 51(1)           | 27(1)           | 34(1)           | 3(1)            |
| C(4)  | 56(1)           | 27(1)           | 37(1)           | 2(1)            |
| C(5)  | 57(1)           | 28(1)           | 34(1)           | 2(1)            |
| C(6)  | 34(1)           | 24(1)           | 27(1)           | 1(1)            |
| C(11) | 24(1)           | 27(1)           | 29(1)           | 1(1)            |
| C(12) | 29(1)           | 34(1)           | 32(1)           | -1(1)           |
| C(13) | 31(1)           | 44(1)           | 47(1)           | -2(1)           |
| C(14) | 28(1)           | 51(1)           | 54(1)           | 5(1)            |
| C(15) | 29(1)           | 58(1)           | 39(1)           | 1(1)            |
| C(16) | 30(1)           | 45(1)           | 31(1)           | -1(1)           |
| C(21) | 29(1)           | 30(1)           | 27(1)           | 2(1)            |
| C(22) | 32(1)           | 36(1)           | 30(1)           | -1(1)           |
| C(23) | 47(1)           | 45(1)           | 34(1)           | -9(1)           |
| C(24) | 47(1)           | 48(1)           | 34(1)           | -2(1)           |
| C(25) | 35(1)           | 58(1)           | 41(1)           | 1(1)            |



|        |        |       |       |        |
|--------|--------|-------|-------|--------|
| C(26)  | 32(1)  | 51(1) | 34(1) | 0(1)   |
| C(31)  | 24(1)  | 38(1) | 26(1) | 3(1)   |
| C(32)  | 32(1)  | 56(1) | 32(1) | -7(1)  |
| C(33)  | 36(1)  | 93(2) | 30(1) | -12(1) |
| C(34)  | 32(1)  | 94(2) | 31(1) | 15(1)  |
| C(35)  | 33(1)  | 62(2) | 46(1) | 23(1)  |
| C(36)  | 31(1)  | 41(1) | 41(1) | 9(1)   |
| C(41)  | 32(1)  | 33(1) | 27(1) | 4(1)   |
| C(42)  | 33(1)  | 34(1) | 27(1) | 1(1)   |
| C(43)  | 47(1)  | 48(1) | 37(1) | -8(1)  |
| C(44)  | 45(1)  | 57(1) | 42(1) | 1(1)   |
| C(45)  | 40(1)  | 63(2) | 49(1) | 7(1)   |
| C(46)  | 42(1)  | 47(1) | 44(1) | -1(1)  |
| C(51)  | 30(1)  | 30(1) | 27(1) | 1(1)   |
| C(52)  | 30(1)  | 33(1) | 28(1) | 3(1)   |
| C(53)  | 39(1)  | 46(1) | 39(1) | 4(1)   |
| C(54)  | 33(1)  | 59(1) | 54(1) | 10(1)  |
| C(55)  | 35(1)  | 63(2) | 56(2) | -3(1)  |
| C(56)  | 41(1)  | 45(1) | 44(1) | -8(1)  |
| C(61)  | 32(1)  | 34(1) | 26(1) | 0(1)   |
| C(62)  | 50(1)  | 40(1) | 38(1) | -7(1)  |
| C(63)  | 51(1)  | 57(1) | 37(1) | -15(1) |
| C(64)  | 36(1)  | 65(2) | 28(1) | 4(1)   |
| C(65)  | 54(1)  | 46(1) | 43(1) | 9(1)   |
| C(66)  | 56(1)  | 35(1) | 42(1) | 3(1)   |
| Cl(71) | 87(1)  | 93(1) | 80(1) | -47(1) |
| Cl(72) | 107(1) | 75(1) | 61(1) | 0(1)   |
| C(71)  | 54(1)  | 52(1) | 61(2) | -20(1) |
| C(72)  | 60(2)  | 46(1) | 52(1) | -8(1)  |
| C(73)  | 64(2)  | 47(1) | 58(2) | -13(1) |
| C(74)  | 72(2)  | 57(2) | 52(2) | -14(1) |
| C(75)  | 70(2)  | 56(2) | 63(2) | -3(1)  |
| C(76)  | 58(2)  | 51(2) | 78(2) | -12(1) |
| Cl(81) | 182(3) | 57(1) | 48(1) | -2(1)  |
| Cl(82) | 115(2) | 73(1) | 82(1) | -10(1) |
| C(81)  | 130(5) | 49(3) | 34(2) | -9(2)  |
| C(82)  | 114(6) | 66(5) | 48(5) | -18(4) |
| C(83)  | 111(5) | 65(3) | 61(3) | -38(3) |
| C(84)  | 143(6) | 84(6) | 69(6) | -22(5) |
| C(85)  | 121(6) | 88(5) | 66(4) | -20(4) |
| C(86)  | 122(6) | 76(6) | 54(6) | -23(5) |

**Table S5** Summary of interactions identified in **H·1.5(oDCB)**

| Interaction type      | Bond length/ Å                                  | Associated bond angle/ ° | Symmetry code |
|-----------------------|-------------------------------------------------|--------------------------|---------------|
| (host)C–H···π(guest)  | 2.71 <sup>a</sup> , 3.647 (3) <sup>b</sup>      | 161                      | 1+X, Y, Z     |
| (host)C–Cl···π(guest) | 3.615 (3) <sup>c</sup> , 5.122 (6) <sup>b</sup> | 144.7 (3)                | X, Y, Z       |
| (host)C–H···N(host)   | 2.46 <sup>d</sup> , 2.808 (3) <sup>e</sup>      | 102                      | 1–X, 1–Y, 1–Z |
| (host)C–H···N(host)   | 2.42 <sup>d</sup> , 2.779 (3) <sup>e</sup>      | 102                      | 1–X, 1–Y, 1–Z |
| (host)C–H···O(host)   | 2.46 <sup>f</sup> , 3.389 (3) <sup>g</sup>      | 167                      | 1–X, 1–Y, 1–Z |

<sup>a</sup>H···π bond distance

<sup>b</sup>C···π bond distance

<sup>c</sup>Cl···π bond distance

<sup>d</sup>H···N bond distance

<sup>e</sup>C···N bond distance

<sup>f</sup>H···O bond distance

<sup>g</sup>C···O bond distance
